# Supplementary material for: Repeated Emergence of Variant TetR Family Regulator, FarR, and Increased Resistance to Antimicrobial Unsaturated Fatty Acid among Clonal Complex 5 Methicillin-Resistant Staphylococcus aureus
Source: PubMed Central journal article supplement (PMC10019231; doi:10.1128/aac.00749-22), 2023-02-06
Supplement: aac.00749-22-s0003.pdf [file aac.00749-22-s0003.pdf]

Figure S2

Nucleotide Alignment of Representative farR Cluster Genes

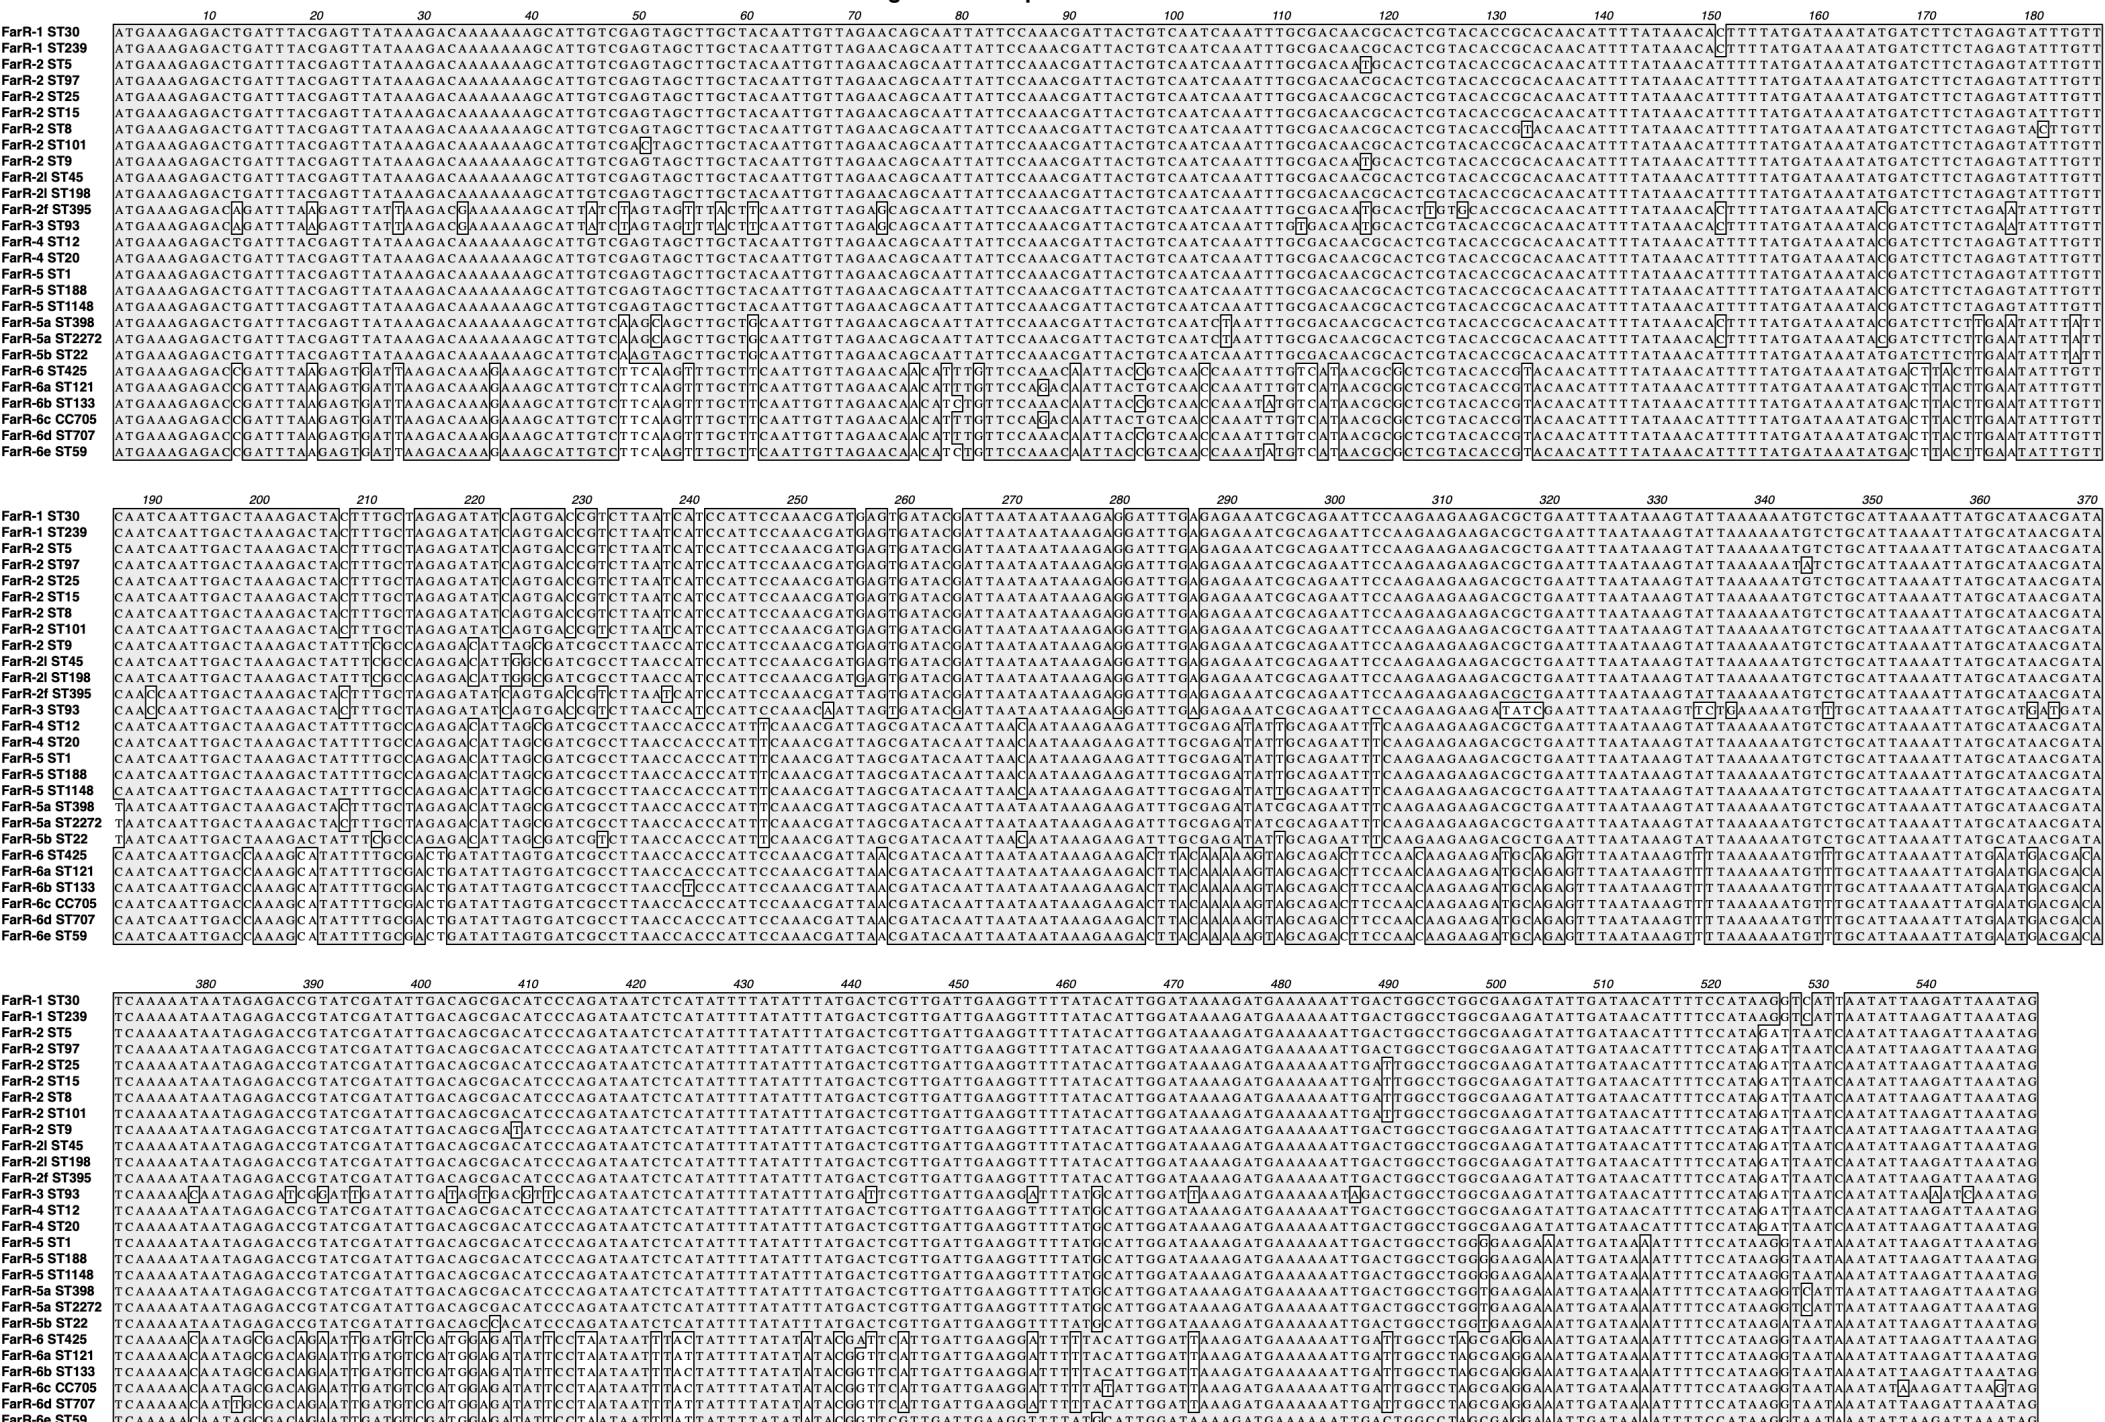





**Figure S4:** Phylogenetic detail of cluster 2c (FarR-E93EE) strains.

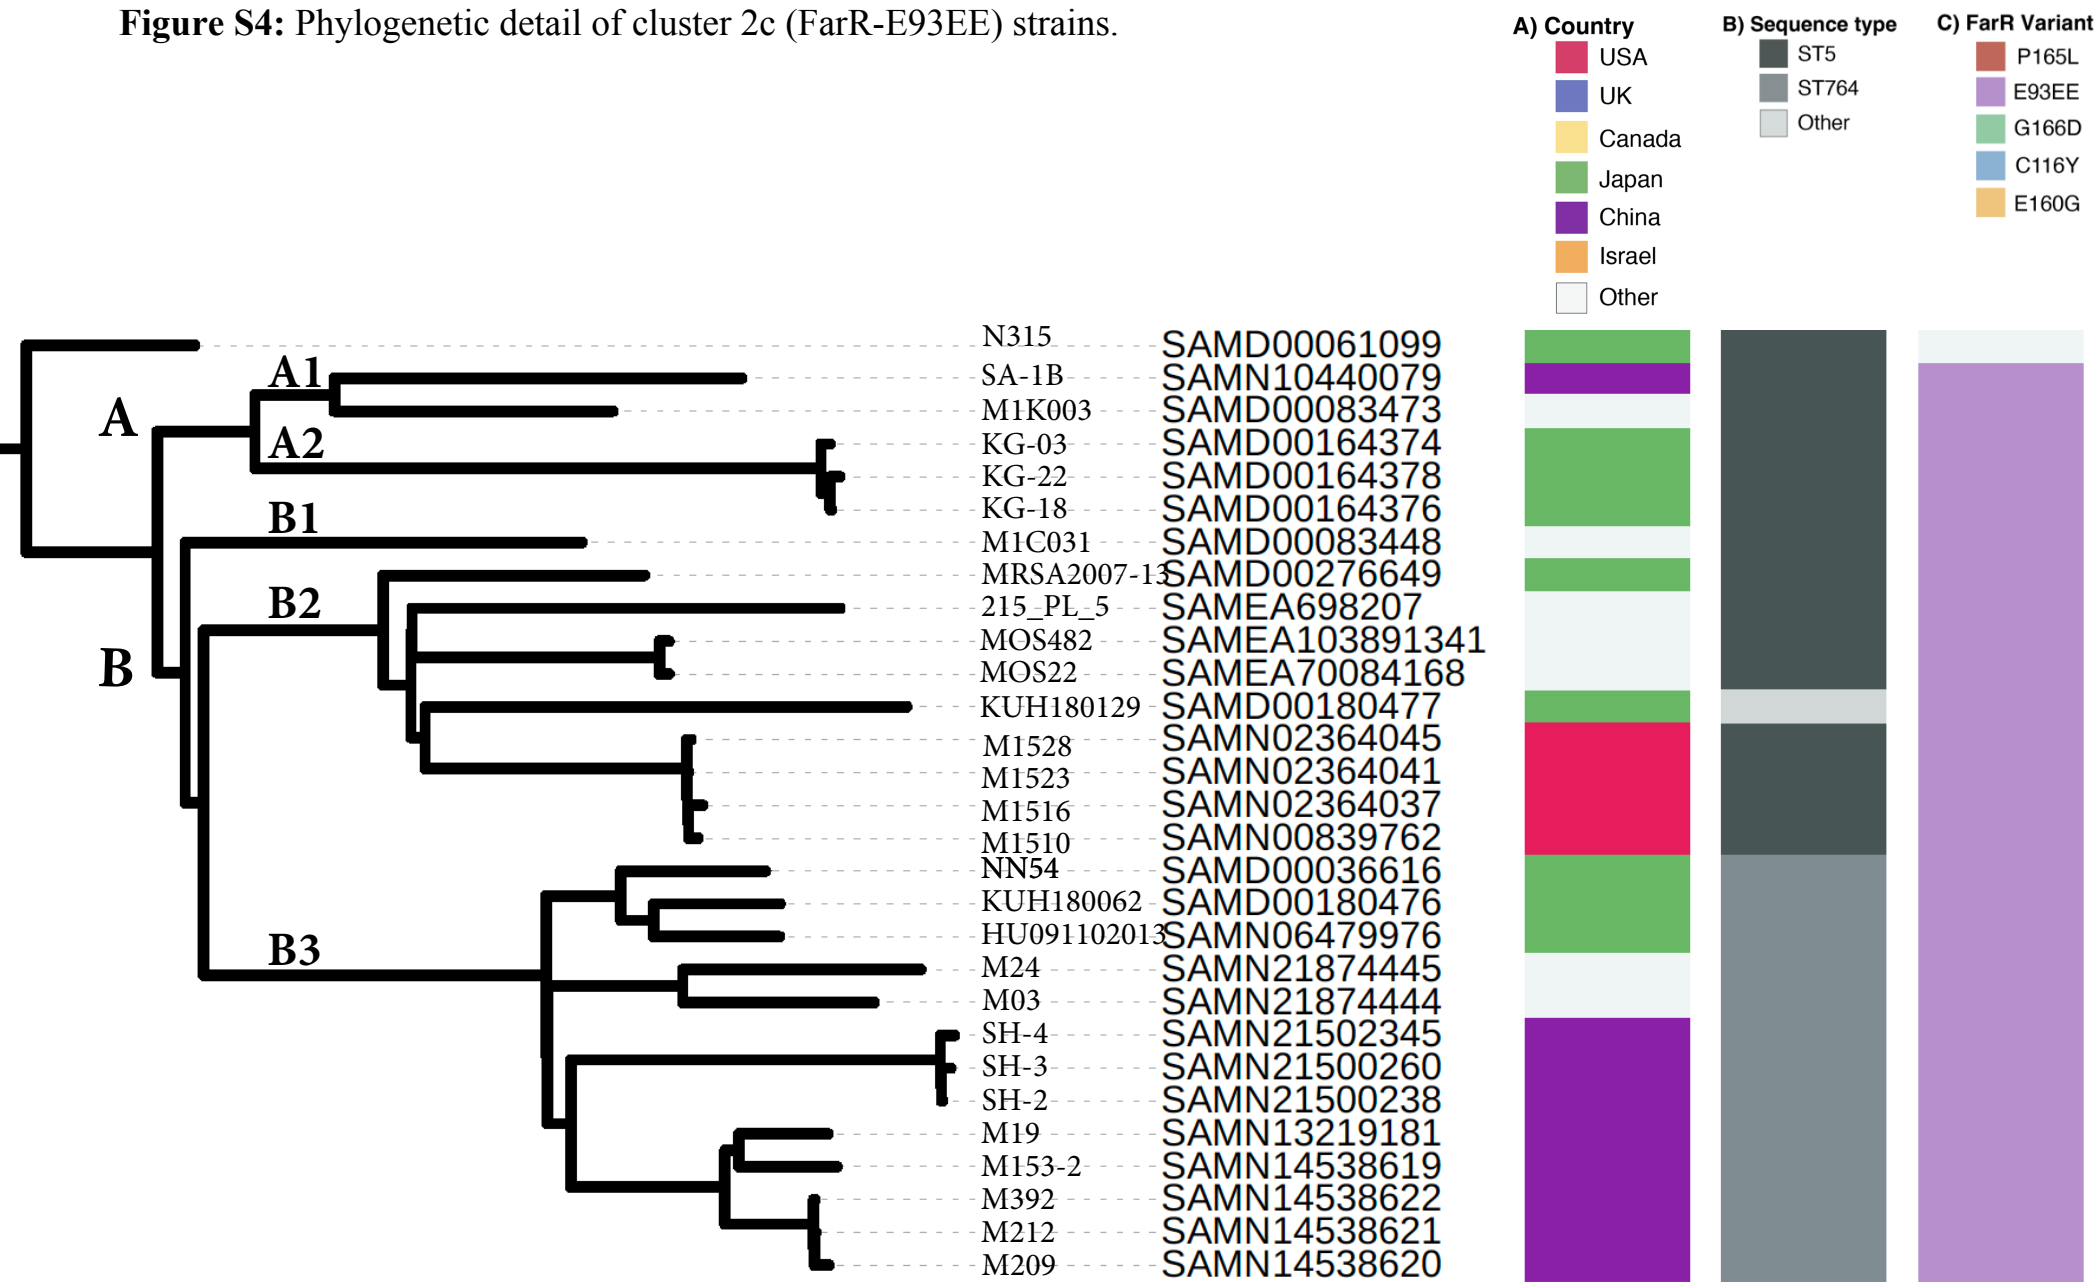

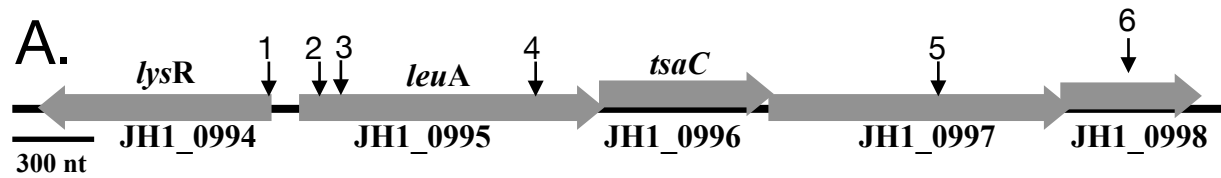

**B.**

ATGATTTCGAATTCAAGATAATACAATAAGGGATGGTATGCAACAAAGTAATGTTTCGAAAAAGTCTAA  
 TTATAAAAAAAGAAGTATTGAAACAAATTAACAAGTTAAATATAAAATTTCTGTTGAAGTAGGCATGTG  
 TACAACATATCGAGGATGAATTTAATATTCATCAATTCAGAGACATTTTAAGTCCTGAAAAAGAATTA  
 GTAGTATTGACTAGGCTTAATGAAAAAGAAATAAAAAAATAGTCAAATGAAAATTCATAATTTAG  
 TGGTAAAAATACTATTGCCAATATCTGACTTGCATATAAAAGAAAAGCTTAATTTTTCAAATAAATA  
 TTATATTCAGAAAATCAAAGACTGCTTGGATATATTTAAAGAAAGATAAAAAAGGAGTAGATATTTGT  
 TTTGAAGATGCAACAAGGACTTCTAGAGAAAAATTGAAAGAATACATGGAAATTATTTCAAATATC  
 AAGTTAGAACAGTTACATTTGCGGACACTGTAGGATGTTTCGACACCATTAGAATACGGAGATATTTT  
 TAATTAATTTGTAAAAAATATTCTAACATAATTTTTTCTGCTCATTGTCATAACGATCTAGGGTTG  
 GCTACTGCAAATACATTAGCTGCAATTTTTAAATGGTGCAAAGCAAATAGAACTACATTTTTGGGAA  
 TTGGTGAGAGAGCGGGTAATGCTCCTATTGAGGAAATAATTACTATTTTGACAAAAAAACAAATAGA  
 AAGTACGGAATTCATTTACCCGACGTATATAAACTAGTATTAATATTTCTAAAATTTCTCGATTTT  
 CAAATATCAGAAAACAAACCTATAATTGGTAAAAATATATTTAAACATGAATCAGGAATTCATCAAG  
 ATGGTACTAAAAAAATATAAATATGTATCAATATTTAGTTCCCTAGTGATTTAGGATTGAAAAATTC  
 ACAAGTTGTTTCAGTTTTCCAATAAGTAATATTTCTAGTAAGAAAATCTTGCACAATAAAATTTAAATCA  
 ATAGTTAACACTGAAGAAATTTGATGAAAAATTTCTTTCTATAAACTTGTGAACAAGTTTTACCTG  
 AAGTAGCACCTGAAGATACAGTGGATTTACTTTCAGATAATAAAAAGGAGGAGTAAAGATGGAAATTT  
 TAAATGA

**Fig. S5A: *lysR-leuA* locus and accumulated pseudogenes in FarR<sup>E93EE</sup> strains.** *lysR*, LysR family transcriptional regulator; *leuA*, putative isopropylmalate synthase; *tsaC*, putative threonylcarbomyladenylate synthase; JH1\_0997, membrane associated protein; JH1\_0998, putative phospholipid binding protein. The location of single nucleotide polymorphisms that confer pseudogenes in different strains are indicated by arrows; (1), Y6\* premature stop codon in SA-1B; (2), frameshift at codon I24 in KUH180129; (3), frameshift at I78 in SH-4, SH-3, SH-2, M19, M153-2, M392, M212, and M209; (4), frameshift at K294 in KUH180129; (5), frameshift at G214 in KUH180129; (6), frameshift at S87 in M1510, M1516, M1523, and M1528.

**Fig. S5B:** Nucleotide sequence and location of indels at polyA segments in *leuA* (SaurJH1\_0995). **Bold underlined** segments represent sites 2, 3 and 4 respectively in S5A, and the ***bold italic*** segment indicates the site of a frameshift in some FarR<sup>P165L</sup> strains.

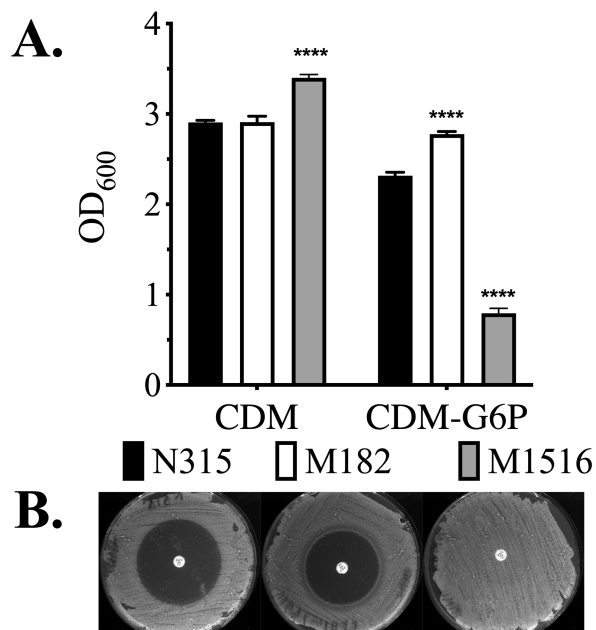

**Figure S6. Phenotype of FarR<sup>E93EE</sup> strain M1516 is consistent with a defect in *uhpT*.**

(A), Growth of *S. aureus* strains N315, M182 (FarR<sup>C116Y</sup>) and M1516 (FarR<sup>E93EE</sup>) in CDM containing glucose or glucose-6-phosphate (G6P) as carbon source. All data points represent the mean  $\pm$  SD from triplicate 3 mL tube cultures after 24h growth. Statistically significant differences (\*\*\*\*,  $P < 0.0001$ ; \*\*\*,  $P < 0.001$ ; \*,  $P < 0.05$ ) compared to *S. aureus* N315 were determined by Tukey's multiple comparison test. (B), Fosfomycin sensi-disc assay. A Fosfomycin sensi-disc (BBL) containing 200  $\mu$ g fosfomycin was placed on the surface of a TSA plate that had been swabbed with *S. aureus* N315, M182 or M1516. Plates were photographed after incubation at 37°C for 18h.
